# Supplementary material for: Enhancing 1-month temperature predictions in South Korea through dynamical downscaling of machine learning global ensemble forecasts
Source: Research Square preprint supplement (doi:10.21203/rs.3.rs-7639295/v1), 2025-10-07
Supplement: Supplementary file 1 [file 4ffb04bb3a9d98a041312250.docx]

Enhancing 1-month temperature predictions in South Korea through dynamical downscaling of machine learning global ensemble forecasts

**Supplementary Materials**

Subin Ha1, Xiaohui Zhong2, Lei Chen2, Hao Li2, Jina Hur3, Hyun-Han Kwon4,

and Eun-Soon Im1,5

1 Department of Civil and Environmental Engineering, The Hong Kong University of Science and Technology, Hong Kong SAR

2 Artificial Intelligence Innovation and Incubation Institute, Fudan University, Shanghai, China

3 National Institute of Agricultural Sciences, Rural Development Administration, Wanju-gun, Republic of Korea

4 Department of Civil and Environmental Engineering, Sejong University, Seoul, Republic of Korea

5 Division of Environment and Sustainability, The Hong Kong University of Science and Technology, Hong Kong SAR


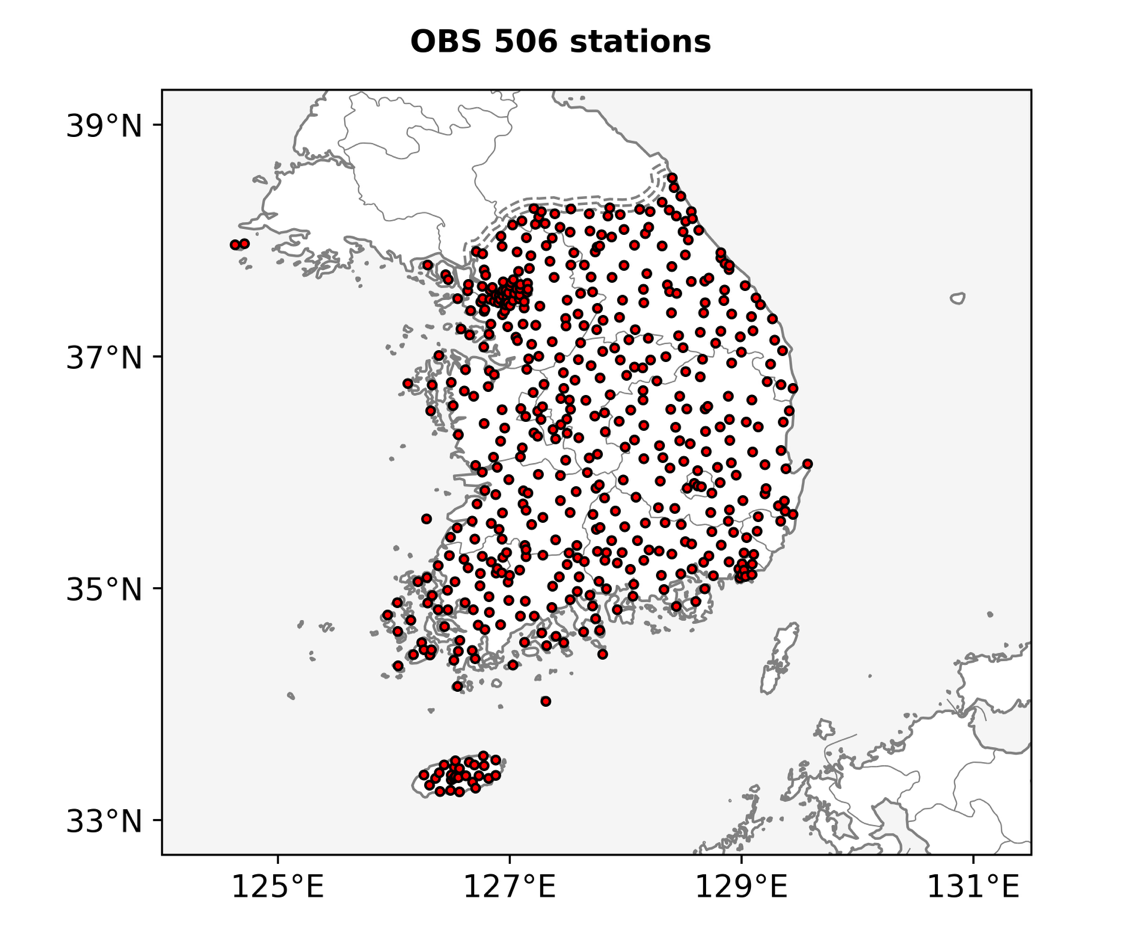


Fig. S1. Locations of the 506 observation stations


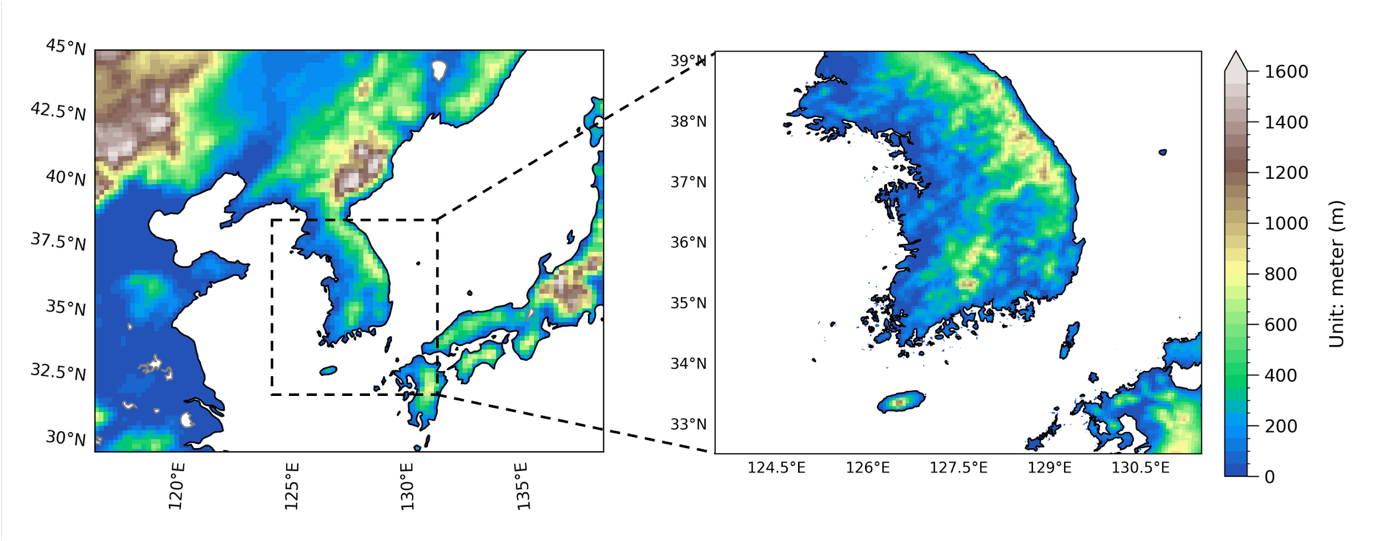


Fig. S2. The model domains that comprise of the 20-km mother domain and the 5-km nested domain


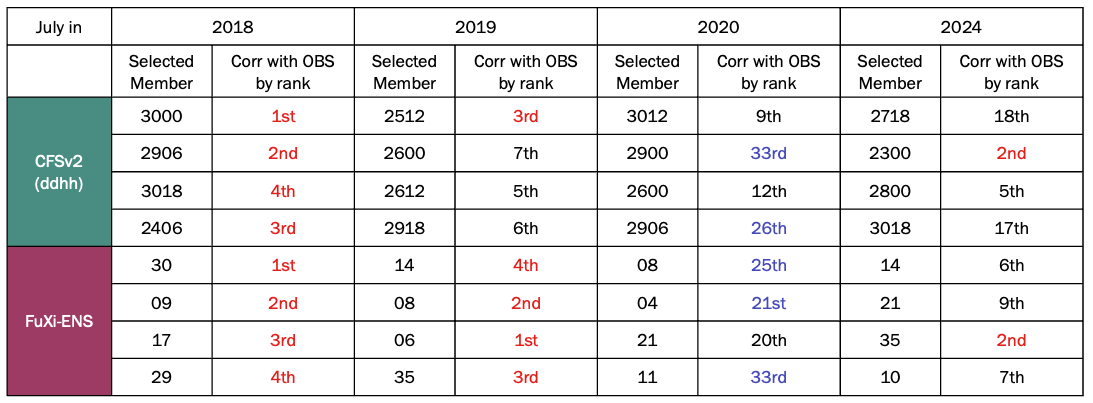


Table S1. Selected CFSv2 and Fuxi members and their actual daily Tmean correlations with OBS by rank out of 40 members (The top 10% rankings are colored in red, and the bottom 50% rankings are colored in blue.)


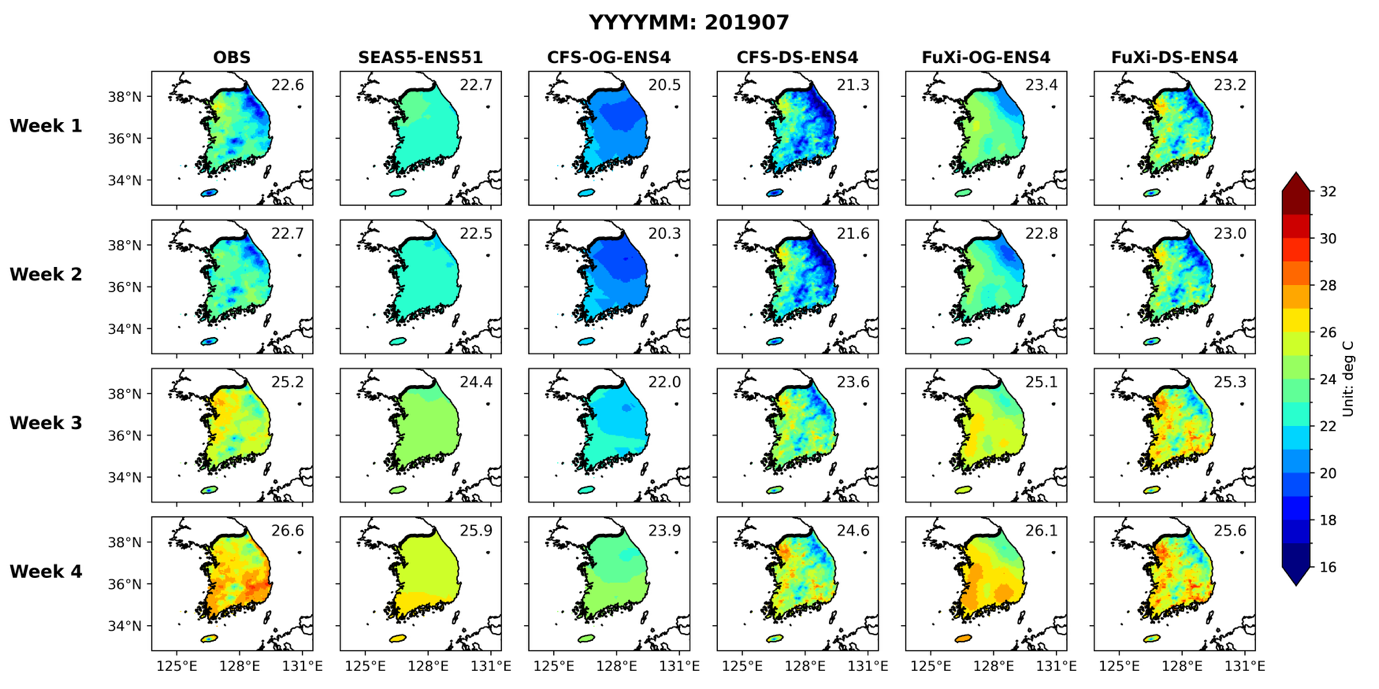


Fig. S3. Weekly Tmean spatial maps of OBS, SEAS5-ENS, CFS-OG-ENS4, CFS-DS-ENS4, FuXi-OG-ENS4, and FuXi-DS-ENS4 for July 2019
